# Supplementary material
Source: publisher figshare collection journal article supplement (https://wellcome.figshare.com/articles/dataset/_/5897614)
Supplement: Supplementary file 3 [file 3]

Archive with 2 entries (2 files):
- Wellcome Trust_Data Repositories Standards_Final Report_Final Version_2.0_May2018.pdf
- Appendix 1 - Systematic Review of Online Repositories for Neglected Infectious Diseases.pdf
